# Supplementary material for: NAT10-mediated ac4C modification of Lipin1 mRNA contributes to the pathogenesis of PWMI
Source: JCI journal article supplement (doi:10.1172/jci.insight.193712), 2025-08-08
Supplement: sd1 [file 1]

982 **Supplementary Figure 1**

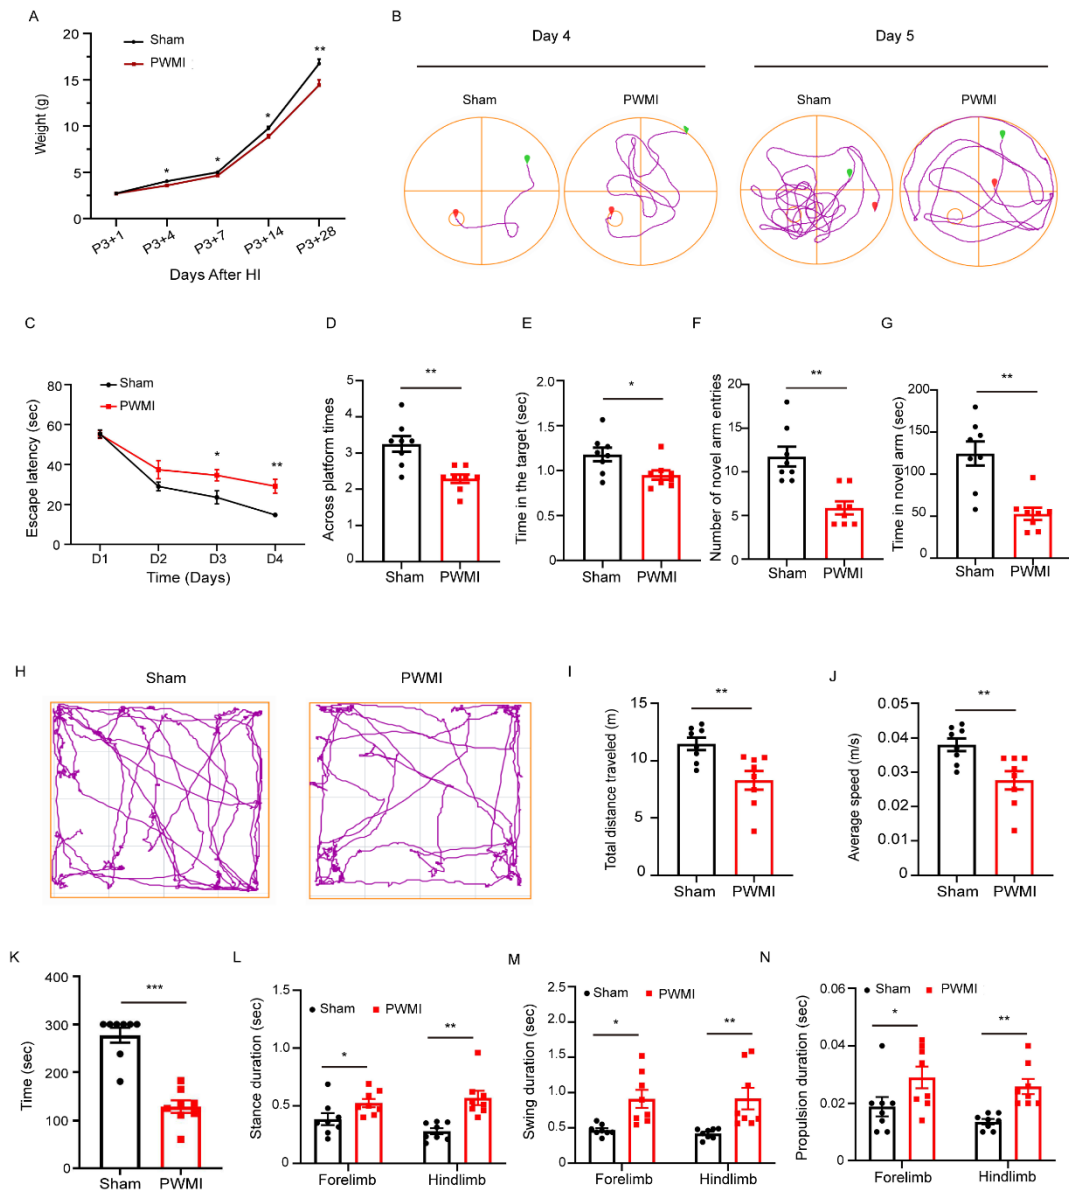

**Supplementary Figure 1. Impaired Spatial Memory and Motor Function in PWMI**

**Model Mice.** A: Comparison of weight gain between PWMI group and Sham group. B:

Representative trajectory plots of both groups of mice on days 4 and 5 of the Morris

water maze task. C: The average time spent to locate the hidden platform during the

first four days of the spatial navigation training in both groups of mice. D-E: The

number of crossings and the time spent in the original platform area during the spatial

probe test on day 5 in both groups of mice. F-G: The number of entries into the novel

arm and the time spent in the novel arm in the Y-maze test for both groups of mice. H:

Representative trajectory plots of both groups of mice in the open field test. I-J: Total

distance traveled and average speed of both groups of mice in the open field. K: The

time spent on the rotating rod by both groups of mice. L-N: Gait analysis of both groups

of mice, including the duration of stance, swing, and propulsion phases for the forelimbs

996 and hindlimbs.  $n = 8$ . Statistics, two-tailed Student's t-test (A, D, E, G, I, J, L, M, N),  
997 two-way ANOVA with Tukey's multiple comparisons test (C) and Mann-Whitney test  
998 (F, K). The results were expressed as Mean  $\pm$  SEM, \*  $P < 0.05$ , \*\*  $P < 0.01$ , \*\*\*  $P <$   
999 0.001.  
1000

1001 **Supplementary Figure 2**

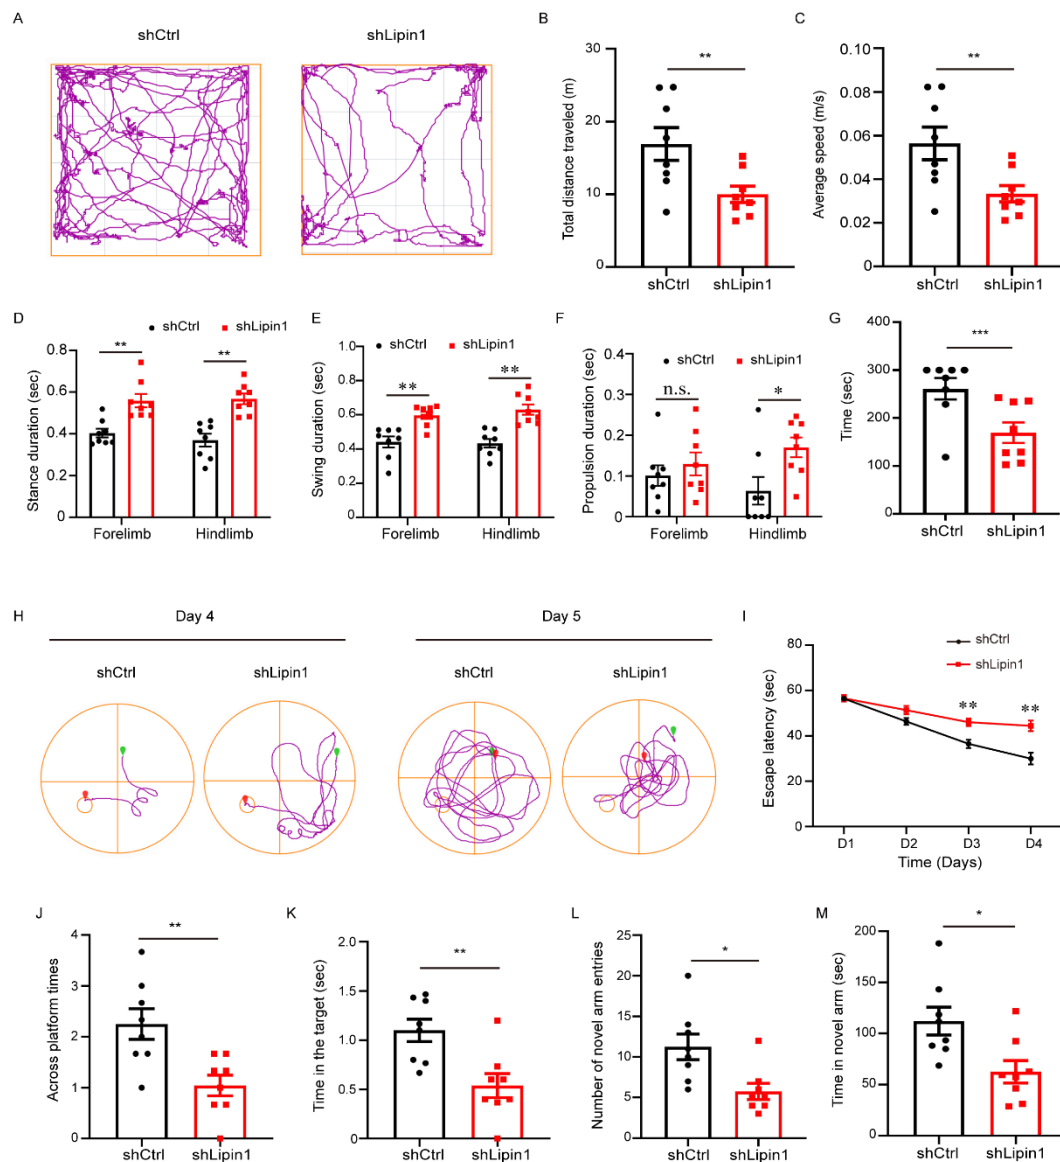

**Supplementary Figure 2. Downregulation of Lipin1 in Vivo in the Corpus Callosum Resulted in Impaired Spatial Memory and Motor Function in Mice.**

**A:** Representative track diagram showing the movement of mice from both groups in the open field. **B-C:** Total distance traveled and average speed of mice from both groups in the open field. **D-F:** Gait analysis showing the standing duration, swing duration, and propulsive duration of the forelimb and hindlimb in both groups of mice. **G:** Duration of time spent by mice from both groups on the rotating rod. **H:** Morris water maze experiment on days 4 and 5, showing the representative trajectory of mice from both groups. **I:** The average time taken by both groups of mice to locate the hidden platforms during the first 4 days of the orientation navigation training. **J-K:** The number of times both groups of mice crossed the original platform and the time spent on it during the 5th day of the spatial exploration experiment. **L-M:** In the Y-maze experiment, the number of entries into the new arm and the time spent in the new arm by both groups of mice. Statistics, two-tailed Student's t-test (B, C, F, J, K, M), Mann-Whitney test (D,

1017 E, G, L) and two-way ANOVA with Tukey's multiple comparisons test (I). The results  
1018 were expressed as Mean  $\pm$  SEM, n = 8, \*  $P < 0.05$ , \*\*  $P < 0.01$ , \*\*\*  $P < 0.001$ .  
1019

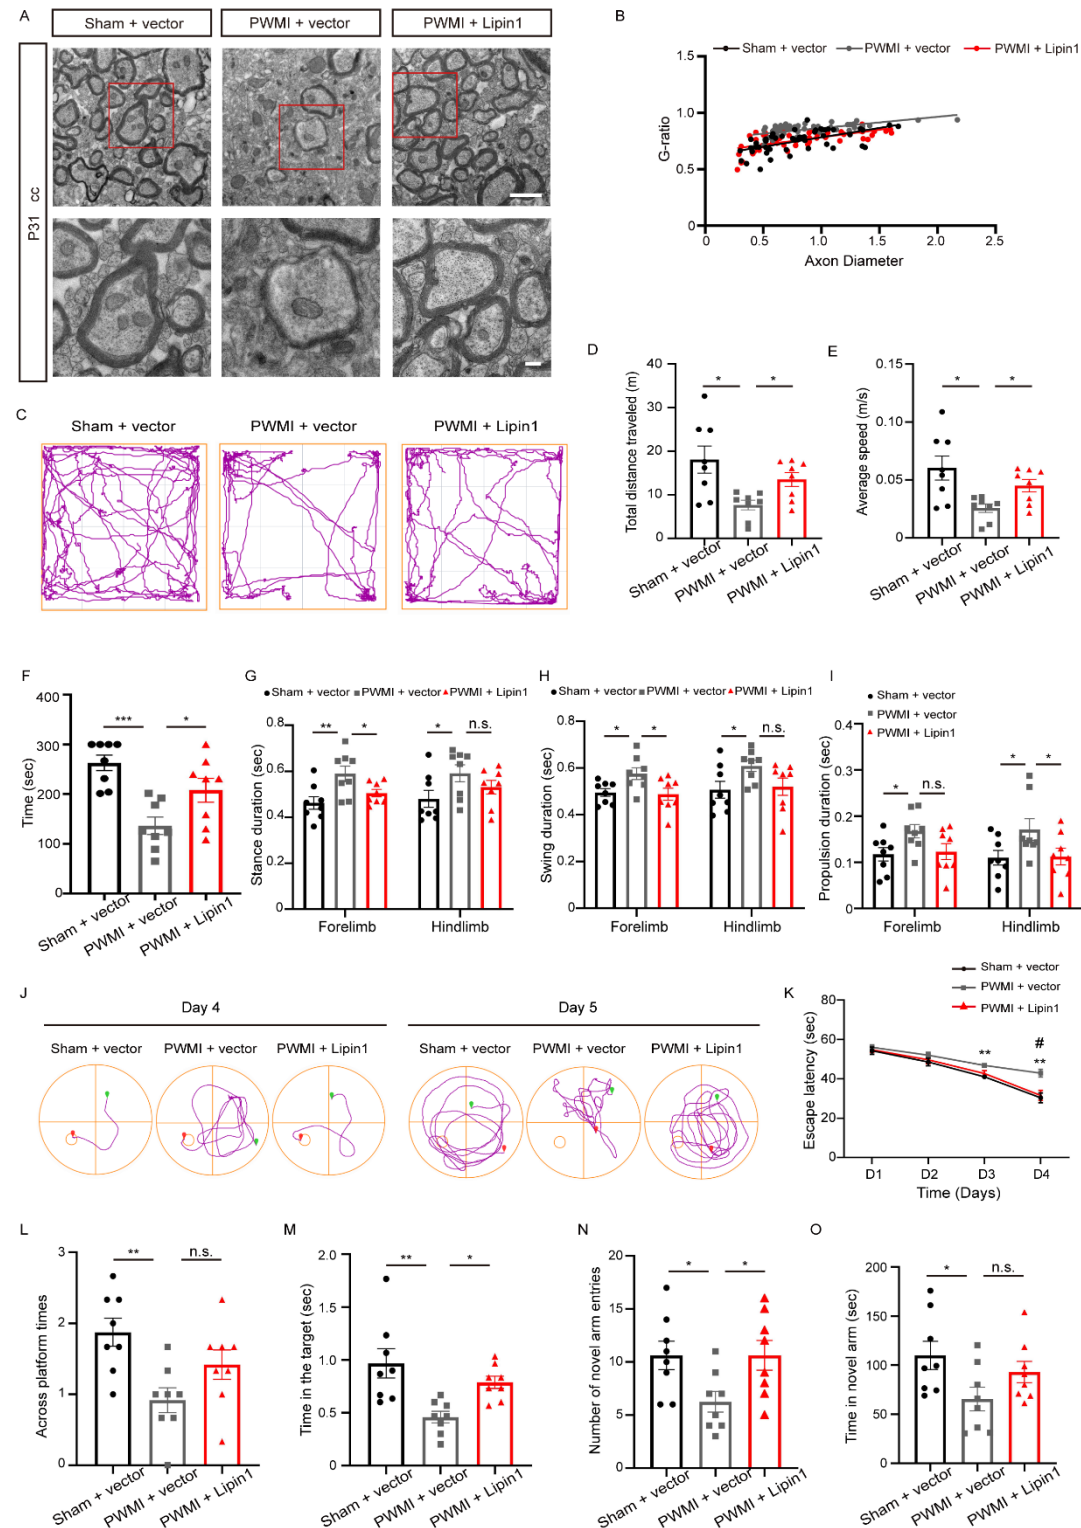

1021

1022

1023

1024

1025

1026

**Supplementary Figure 3. Overexpression of Lipin1 in the Corpus Callosum Improves Spatial Memory and Motor Function in PWMI Mice.** A: TEM images of myelin in the corpus callosum, with high magnification images shown as insets of low magnification images. Low magnification Bar = 1  $\mu$ m, high magnification Bar = 200 nm. B: Distribution and statistical analysis of G-ratio of myelinated axons in the three

groups of mice.  $n = 3$ . C-E: Representative track diagram, total distance, and average speed of the three mouse groups in the open field. F: The time spent by the three mouse groups on the rotating rod. G-I: Gait analysis measured the standing, swing, and propulsive durations of the forelimb and hindlimb in the three mouse groups. J: Morris water maze experiment on days 4 and 5, showing the representative trajectory of the three mouse groups. K: The average time taken by the three mouse groups to locate the hidden platform during the first 4 days of orientation navigation training, \* Sham + vector vs. PWMI + vector; # PWMI + vector vs. PWMI + Lipin1. L-M: The number of times the three mouse groups crossed the original platform and the time spent on it during the space exploration experiment on day 5. N-O: In the Y-maze experiment, the number of entries into the new arm and the time spent in the new arm by the three mouse groups.  $n = 8$ . Statistics, one-way ANOVA with LSD post-hoc analysis (D, E, F, G, H, I, L, M, N, O) and two-way ANOVA with Tukey's multiple comparisons test (K). The results were expressed as Mean  $\pm$  SEM, \*  $P < 0.05$ , \*\*  $P < 0.01$ , \*\*\*  $P < 0.001$ .

Supplementary Figure 4

A

| Primer pair 1                                                            |                             |        |       |       |                      |                         |
|--------------------------------------------------------------------------|-----------------------------|--------|-------|-------|----------------------|-------------------------|
|                                                                          | Sequence (5'→3')            | Length | Tm    | GC%   | Self complementarity | Self 3' complementarity |
| Forward primer                                                           | AAGAGACTGACAACGATCAGGA      | 22     | 58.84 | 45.45 | 4.00                 | 2.00                    |
| Reverse primer                                                           | TTCCCCAGAGAACCAGTGGAT       | 21     | 60.49 | 52.38 | 5.00                 | 5.00                    |
| Products on target templates                                             |                             |        |       |       |                      |                         |
| >NM_001130412.1 Mus musculus lipin 1 (Lpin1), transcript variant 3, mRNA |                             |        |       |       |                      |                         |
| product length = 190                                                     |                             |        |       |       |                      |                         |
| Forward primer                                                           | 1 AAGAGACTGACAACGATCAGGA 22 |        |       |       |                      |                         |
| Template                                                                 | 475 ..... 496               |        |       |       |                      |                         |
| Reverse primer                                                           | 1 TTCCCCAGAGAACCAGTGGAT 21  |        |       |       |                      |                         |
| Template                                                                 | 664 ..... 644               |        |       |       |                      |                         |

B

| Primer pair 1                                                                                             |                          |        |       |       |                      |                         |
|-----------------------------------------------------------------------------------------------------------|--------------------------|--------|-------|-------|----------------------|-------------------------|
|                                                                                                           | Sequence (5'→3')         | Length | Tm    | GC%   | Self complementarity | Self 3' complementarity |
| Forward primer                                                                                            | GGAGAGTGTTCCTCGTCCC      | 20     | 59.75 | 60.00 | 4.00                 | 1.00                    |
| Reverse primer                                                                                            | ATGAAGGGTCTGTGATGGC      | 20     | 60.39 | 55.00 | 3.00                 | 2.00                    |
| Products on target templates                                                                              |                          |        |       |       |                      |                         |
| >NM_001289726.2 Mus musculus glyceraldehyde-3-phosphate dehydrogenase (Gapdh), transcript variant 1, mRNA |                          |        |       |       |                      |                         |
| product length = 136                                                                                      |                          |        |       |       |                      |                         |
| Forward primer                                                                                            | 1 GGAGAGTGTTCCTCGTCCC 20 |        |       |       |                      |                         |
| Template                                                                                                  | 84 ..... 103             |        |       |       |                      |                         |
| Reverse primer                                                                                            | 1 ATGAAGGGTCTGTGATGGC 20 |        |       |       |                      |                         |
| Template                                                                                                  | 219 ..... 200            |        |       |       |                      |                         |

**Supplementary Figure 4. Verification of primer specificity by NCBI Primer-BLAST.** A-B: Representative screenshots of Primer-BLAST results for the *Lpin1* and *Gapdh* primers used in RT-qPCR. The analyses confirm that each primer pair generates a single, specific amplicon corresponding to the target gene in *Mus musculus*, without significant off-target alignments. Target transcript IDs include *Lpin1* (GenBank: NM\_001130412.1) and *Gapdh* (GenBank: NM\_001289726.2).

1051 Supplementary Table S1 List of Lipin1 mRNA-associated Proteins Identified by Mass  
1052 Spectrometry

| RNA pull down                                            | Peptide (No.) |
|----------------------------------------------------------|---------------|
| RNA helicase (Ddx3x)                                     | 13            |
| Serpine1 mRNA binding protein 1 (Serbp1)                 | 8             |
| Small ribosomal subunit protein (RACK1)                  | 7             |
| RRM domain-containing protein (Hnrnpc)                   | 6             |
| RNA cytidine acetyltransferase (Nat10)                   | 4             |
| DNA-(apurinic or apyrimidinic site) endonuclease (Apex1) | 4             |
| Probable ATP-dependent RNA helicase (DDX6)               | 4             |
| CCN family member 1 (Ccn1)                               | 4             |
| Keratin, type I cytoskeletal 13 (Krt13)                  | 4             |

1053  
1054



1055

Supplementary Table S2 Primer Sequences and qPCR Parameters

| Gene   | Forward Primer<br>(5' to 3') | Reverse Primer<br>(5' to 3') | Amplicon<br>Size (bp) | GenBank<br>Accession |
|--------|------------------------------|------------------------------|-----------------------|----------------------|
| Lipin1 | AAGAGACTGACA                 | TTCCCCAGAGA                  | 190                   | NM_001130            |
|        | ACGATCAGGA                   | ACCAGTGGAT                   |                       | 412.1                |
| Gapdh  | GGAGAGTGTTTC                 | ATGAAGGGGTC                  | 136                   | NM_001289            |
|        | CTCGTCCC                     | GTTGATGGC                    |                       | 726.2                |

1056

1057

1058           Supplementary Table S3 List of Lipin1 shRNA and its blank vector sequences

| Name          | Sequence 5' to 3'   |
|---------------|---------------------|
| Lipin1 shRNA  | GGAGACAACGGAGAAGCAT |
| Control shRNA | GTAGCGCGGTGTATTATAC |

1059  
1060
